# Supplementary material for: Novel monofunctional platinum (II) complex Mono-Pt induces apoptosis-independent autophagic cell death in human ovarian carcinoma cells, distinct from cisplatin
Source: PubMed Central journal article supplement — Autophagy. 2013 Apr 11;9(7):996–1008. doi: 10.4161/auto.24407 (PMC3722334; doi:10.4161/auto.24407), 2013-04-11
Supplement: auto-9-996-s01.pdf [file auto-9-996-s01.pdf]

## **Supplemental Material to:**

**Wen-Jie Guo, Yang-Miao Zhang, Li Zhang, Bin Huang,  
Fei-Fei Tao, Wei Chen, Zi-Jian Guo, Qiang Xu and Yang Sun**

**Novel monofunctional platinum (II) complex Mono-Pt  
induces apoptosis-independent autophagic cell death  
in human ovarian carcinoma cells, distinct from cisplatin**

**Autophagy 2013; 9(7)**

**<http://dx.doi.org/10.4161/auto.24407>**

**[www.landesbioscience.com/journals/autophagy/article/24407](http://www.landesbioscience.com/journals/autophagy/article/24407)**

Supplementary Fig. S1

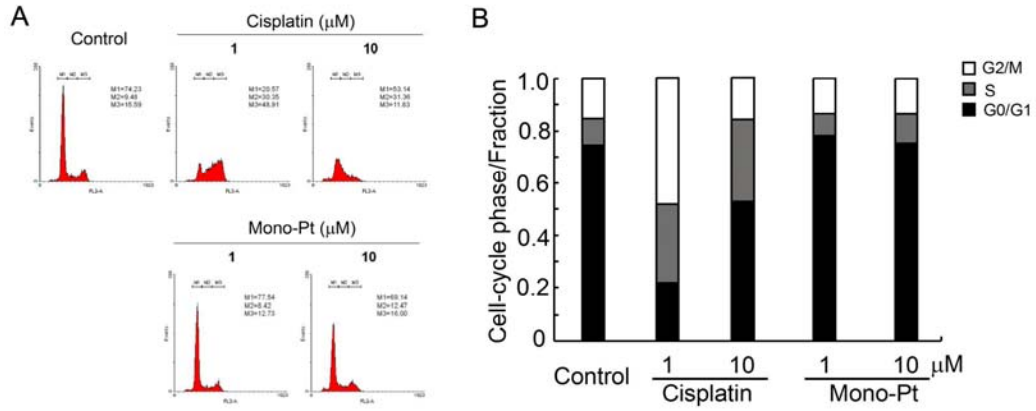

**Figure S1.** Cisplatin but not Mono-Pt induces cell cycle arrest in human ovarian carcinoma Skov-3 cells. About  $5 \times 10^5$  synchronized cells were grown/well in 6-well plates and treated with 1  $\mu\text{M}$  or 10  $\mu\text{M}$  of cisplatin or Mono-Pt for 24 h. M1, M2 and M3 indicated  $G_0/G_1$  phase, S phase and  $G_2/M$  phase. The results shown are representative of three different experiments.

Supplementary Fig. S2

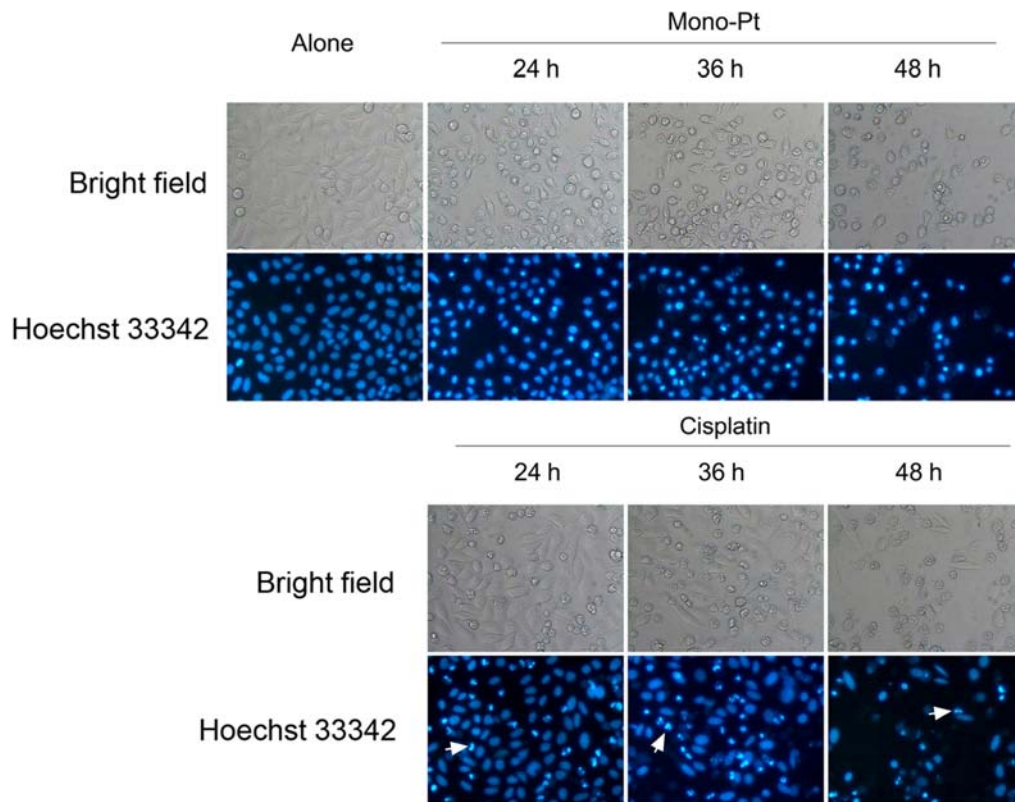

**Figure S2.** Cisplatin but not Mono-Pt induces apoptotic bodies in human ovarian carcinoma Caov-3 cells. The cells treated with 10  $\mu$ M Mono-Pt or 50  $\mu$ M cisplatin were stained and incubated with 1  $\mu$ g/ml Hoechst 33342 (DNA dye, Sigma) in dark for 30 min and observed by converted fluorescence microscopy. The microscopy imaging of cells showed fragmented nuclei (white arrows) in 50  $\mu$ M cisplatin-treated cells. The results shown are representative of three different experiments.

### Supplementary Fig. S3

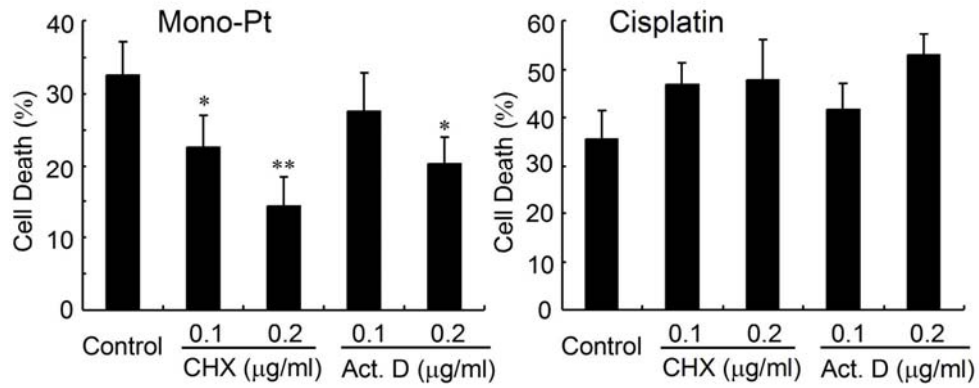

**Figure S3.** Mono-Pt-induced cell death required for *de novo* protein synthesis. Cycloheximide (CHX, Sigma) and actinomycin D (Act. D, Sigma) were incubated Caov-3 cells for 12 h, then cells were treated with 10 μM Mono-Pt or 50 μM cisplatin for 24 h. Cell death was assessed by trypan blue dye exclusion assay. Data represent mean ± SEM of three different experiments. \* $P < 0.05$ , \*\* $P < 0.01$  vs Control group.

Supplementary Fig. S4

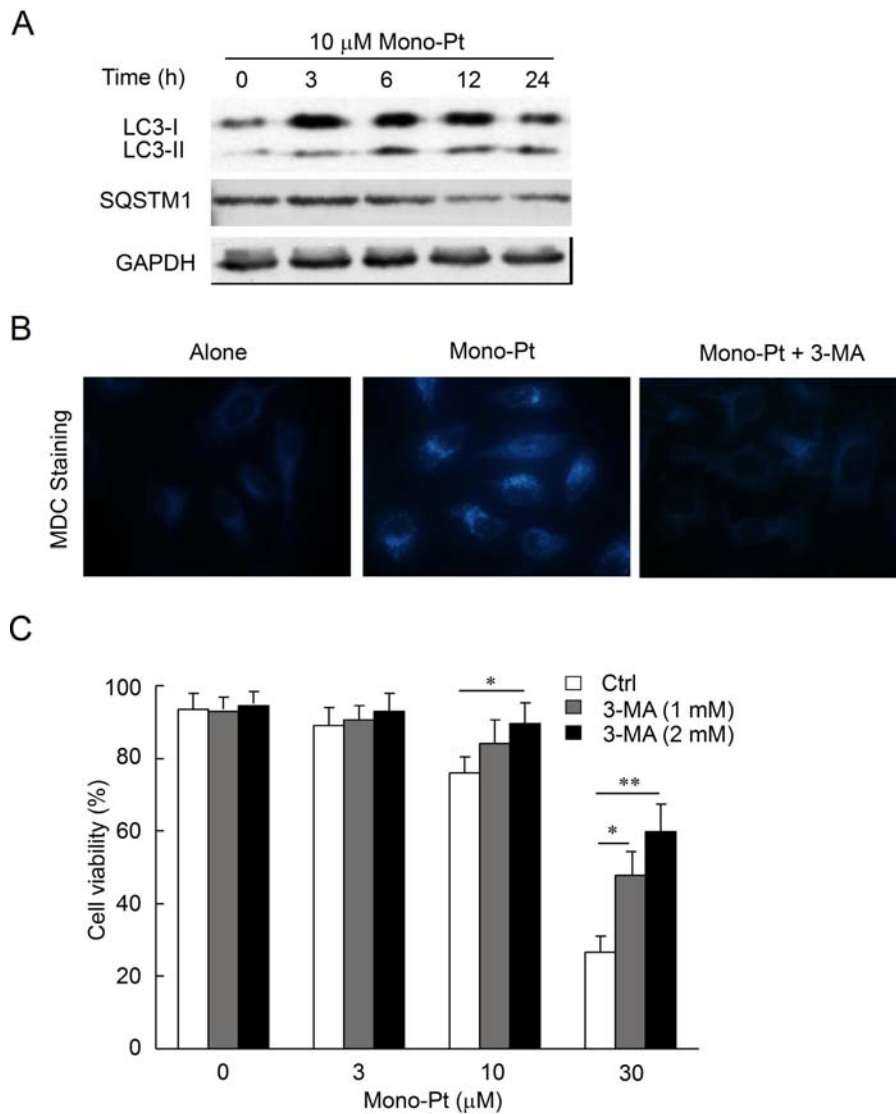

**Figure S4.** Mono-Pt induces autophagy in human ovarian carcinoma Skov-3 cells. **(A)** Skov-3 cells were cultured with 10  $\mu$ M Mono-Pt for 3 h, 6 h, 12 h and 24 h. Then cells were subjected to immunoblotting for LC3 and SQSTM1. **(B)** Skov-3 cells were treated with 10  $\mu$ M Mono-Pt for 12 h in the absence or presence of 2 mM 3-MA and incubated with 0.05 mM monodansylcadaverine (MDC) for 10 min. Cells were then analysed by fluorescence microscopy. The results shown are representative of three experiments. **(C)** After Skov-3 cells were treated with 0, 3, 10 or 30  $\mu$ M Mono-Pt with or without 1 or 2 mM 3-MA for 24 h, cell viability was measured by trypan blue dye exclusion assay. \* $P$ <0.05, \*\* $P$ <0.01.

## Supplementary Fig. S5

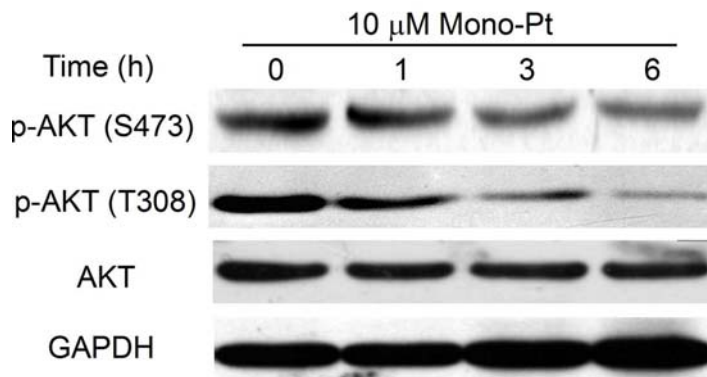

**Figure S5.** Mono-Pt inhibits AKT signaling in human ovarian carcinoma Skov-3 cells. Skov-3 cells treated with 10  $\mu$ M Mono-Pt for indicated time were analyzed by immunoblotting for levels of phospho- and total AKT. The results shown are representative of three different experiments.
